# Supplementary material for: SESN3 Inhibited SMAD3 to Relieve Its Suppression for MiR-124, Thus Regulating Pre-Adipocyte Adipogenesis
Source: MDPI journal article supplement (doi:10.3390/genes12121852), 2021-11-23
Supplement: s1 [file s1]

Supplementary Table S1. The sequence used in the whole paper.

| Name                        | Sequence (5'-3')                                                                   | Length (bp) | TM/°C      |
|-----------------------------|------------------------------------------------------------------------------------|-------------|------------|
| C/EBPα qPCR                 | F: CCTTCAACGACGAGTTCCTGG<br>R: CTGCTTCGACTCGTCCTCCTC                               | 296         | 59.5       |
| C/EBPβ qPCR                 | F: TAAGCACAGCGACGAGTACAAGA<br>R: TTGAACAAGTTCGCGAGGGT                              | 192         | 60         |
| FABP4 qPCR                  | F: GACAGGAAAGTCAAGAGACCA<br>R: TCGGGACAATACATCCAACAGAG                             | 229         | 60         |
| PPARγ qPCR                  | F: CAGAGTATGCCAAGAACATCCCT<br>R: GCAAACCTCGAACTTGGGCTC                             | 223         | 58.5       |
| FoxO1 qPCR                  | F: CTGTCCTACGCCGACCTCA<br>R: CCCACTCTTGCTCCTCT                                     | 255         | 60.5       |
| Sesn3 qPCR                  | F: TGGTCCTGCTGGCATTAT<br>R: GACGCCTCTTCATCTCCCT<br>R: TCAGTGCATTGCCCTTGTC          | 265         | 59.5       |
| GR qPCR                     | F: GAAGGGGGCGGCTGTTTA<br>R: ATCAGTGGGTATCAGCTCTGC                                  | 155         | 60         |
| Smad1 qPCR                  | F: GCCAACCCGGTGCTGA<br>R: CCTCGTGGACGGAGAAACAA                                     | 169         | 59.5       |
| Smad2 qPCR                  | F: ATGTGTTACCATAACCAAGGTCCC<br>R: ATGCCGTGGCACTAATACTGG                            | 241         | 60.5       |
| Smad3 qPCR                  | F: GGAGGAGAAGTGGTGCGAGA<br>R: CACAGGCGGCAGTAGATGACA                                | 198         | 59.5       |
| Smad4 qPCR                  | F: CGCTGGAGCCCAGGTTATC<br>R: ACAATGCTCAGACAGGCATCA                                 | 201         | 60         |
| Smad5 qPCR                  | F: GAGGCTTCCTCAGCCGC<br>R: TTCATTGGTTCAAGTCGGGC                                    | 248         | 60.5       |
| Smad6 qPCR                  | F: CTCTGCGGGCCAGAATCAC<br>R: GTGGCCTCCGTTTCAGTGTA                                  | 113         | 60         |
| Smad7 qPCR                  | F: GTGCAAAGTGTTCAAGGTGGC<br>R: CACAGCATCTGGACAGTCAGT                               | 208         | 60         |
| Smad9 qPCR                  | F: ACACATAGGAAAGGGCGTGC<br>R: TTCAAAGCCATGGTGGACGG                                 | 220         | 60         |
| GAPDH qPCR                  | F: GTTCCAGTATGATTCCACCCAC<br>R: TTCACGCCCATCACAAACAT                               | 270         | 60         |
| ChIP Smad3-<br>124 Primer 1 | F: GCCTTATTTGTTTGGCTGGAG<br>R: GAGGACCAAAGCGTTTCAATC                               | 198         | 59.5       |
| ChIP Smad3-<br>124 Primer 2 | F: CTGAGCAGCGATTGAAAACG<br>R: CCCCTTCTTGGCTTAGTACCCT                               | 178         | 61.5       |
| ChIP Smad3-<br>124 Primer 3 | F: GACCATCTGCGGACGCTTT<br>R: GAGATAAGGTGACGAGAGGACGA<br>F: TCTCGTCCTCTCGTCACCTTATC | 248<br>176  | 61<br>60.5 |

|                             |                                                        |     |    |
|-----------------------------|--------------------------------------------------------|-----|----|
| ChIP Smad3-<br>124 Primer 4 | R: GGCTGTGGCTGCAGAAACC                                 |     |    |
| ChIP FoxO1-<br>Sesn3 Primer | F:TCAACACATTTACCCAACCACAT<br>R:CCAATCTCCTCATTTTTTCGACA | 183 | 62 |
| miR-17 qPCR                 | F: CGGGCCAAAGTGCTTACAGT<br>R:CGCAGGGTCCGAGGTATTC       | 88  | 60 |
| miR-124 qPCR                | F:GTAAGGCACGCGGTGAATG<br>R: CGCAGGGTCCGAGGTATTC        | 84  | 60 |
| si-FoxO1                    | F:GCAUGUUCAUUGAGCGCUUTT<br>R:AAGCGCUCAAUGAACAUGCTT     |     |    |
| si-Sesn3                    | F:GACAGUUACUGGCGUCAAUUTT<br>R:AAUUGACGCCAGUAACUGUCTT   |     |    |
| miR-17 RT                   | GTCGTATCCAGTGCAGGGTCCGAGGTATTCGCACTG<br>GATACGACTCTACC | /   | /  |
| miR-124 RT                  | GTCGTATCCAGTGCAGGGTCCGAGGTATTCGCACTG<br>GATACGACTGGCAT | /   | /  |
| miR-124<br>mimics           | F:UAAGGCACGCGGUGAAUGCCA<br>R:GCAUUCACCGCGUGCCUUAU      | /   | /  |
| miR-124<br>inhibitor        | UGGCAUUCACCGCGUGCCUUA                                  | /   | /  |
